# Supplementary material for: Photovoltaic molecules with ultra-high light energy utilization for near-infrared laser triggered synergetic photodynamic and photothermal therapy
Source: Royal Society of Chemistry journal article supplement (doi:10.1039/d2tb00984f), 2022-01-01
Supplement: d2tb00984f1.pdf [file d2tb00984f1.pdf]

## Electronic Supplementary Information

### **Photovoltaic molecule with ultra-high light energy utilization for near-infrared laser triggered synergetic photodynamic and photothermal therapy**

Ke Yang,<sup>#,a</sup> Zequn Zhang,<sup>#,b</sup> Yabin Gan,<sup>c</sup> Qiuxia Tan,<sup>a</sup> Li Huang,<sup>a</sup> Benhua Wang,<sup>a</sup> Gui Hu,<sup>b</sup> Peng Yin,<sup>c</sup> Xiangzhi Song,<sup>a</sup> Minhuan Lan<sup>\*,a</sup>

<sup>a</sup> Key Laboratory of Hunan Province for Water Environment and Agriculture Product Safety, College of Chemistry and Chemical Engineering, Central South University, Changsha, 410083, P. R. China. Email: minhuanlan@csu.edu.cn

<sup>b</sup> Department of Gastrointestinal Surgery, The Third Xiangya Hospital of Central South University, Tongzipo Road, Changsha, 410013, P. R. China.

<sup>c</sup> Key Laboratory of Chemical Biology and Traditional Chinese Medicine Research (Ministry of Education), College of Chemistry and Chemical Engineering, Hunan Normal University, Changsha, 410081, P. R. China.

<sup>#</sup> The authors contributed equally to this work.

**Table S1.** The summary of the energy utilization efficacy of the reported works.

| PTT Agents       | Wavelength (nm) | PCE (%)     | $^1\text{O}_2$ (%) | Energy Utilization Efficacy | Reference        |
|------------------|-----------------|-------------|--------------------|-----------------------------|------------------|
| <b>IEICO NPs</b> | <b>808</b>      | <b>85.4</b> | <b>11</b>          | <b>96.4</b>                 | <b>This work</b> |
| Nano-PT          | 785             | 27.8        | /                  | 27.8                        | 1                |
| ZSY-TPE          | 808             | 28.4        | 13.8               | 42.2                        | 2                |
| BTA NPs          | 808             | 33          | 28.3               | 61.3                        | 3                |
| DTRGD NPs        | 721             | 33          | 0.51               | 33.51                       | 4                |
| SQP-NPs          | 810             | 36          | /                  | 36                          | 5                |
| TPBT NPs         | 808             | 36.5        | 18.3               | 54.8                        | 6                |
| BPN-BBTD NPs     | 785             | 39.8        | /                  | 39.8                        | 7                |
| P@BDP            | 808             | 42          | 6.4                | 48.4                        | 8                |
| PF               | 808             | 42.3        | /                  | 42.3                        | 9                |
| FS-GdNDs         | 808             | 43.99       | /                  | 43.99                       | 10               |
| DPP-BT NPs       | 730             | 50          | 27.3               | 77.3                        | 11               |
| ETTC NPs         | 808             | 52.8        | 2.56               | 55.36                       | 12               |
| IT-S NPs         | 635             | 72.3        | /                  | 72.3                        | 13               |
| F8-PEG NPs       | 808             | 82          | /                  | 82                          | 14               |

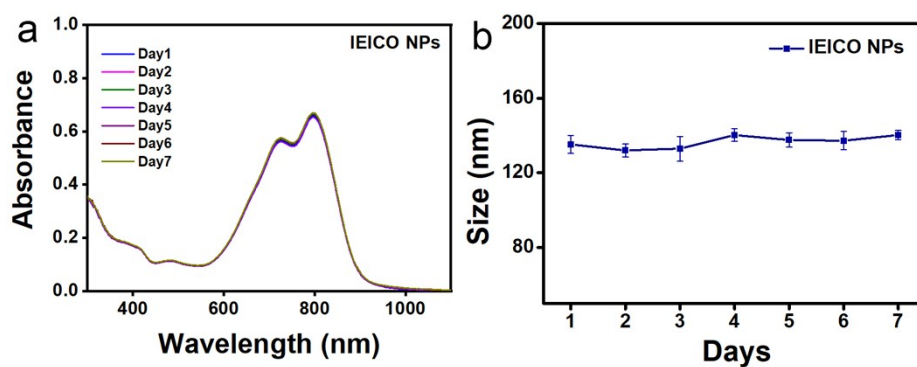

**Figure S1.** The (a) absorbance spectra and (b) size distribution of IEICO NPs within 7

days.

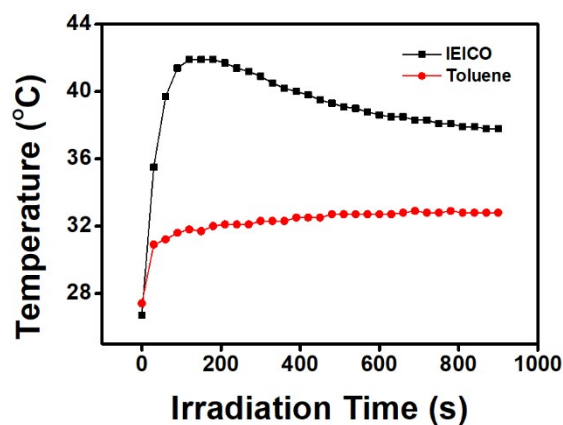

**Figure S2.** Time-dependent temperature variation of IEICO aqueous (in Toluene) and pure toluene under the 808 nm laser irradiation ( $1 \text{ W/cm}^2$ ).

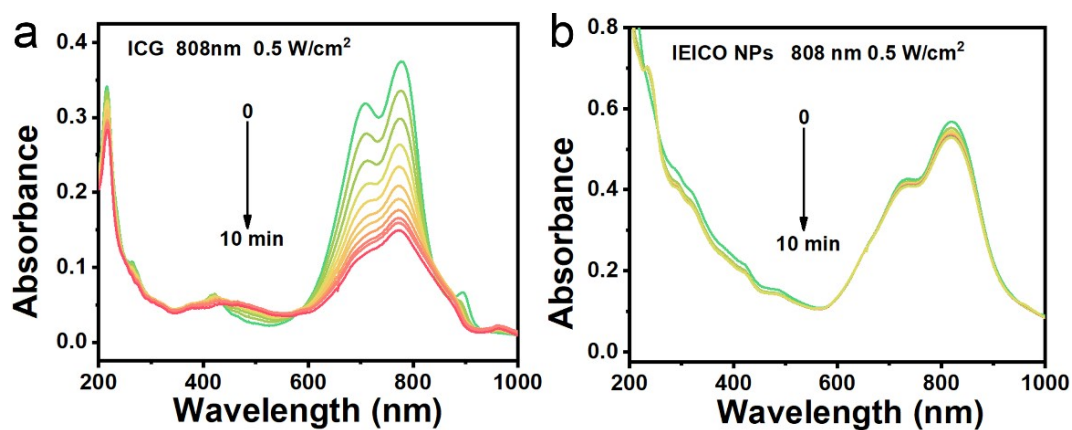

**Figure S3.** Time-dependent absorption spectra of (a) ICG and (b) IEICO NPs under laser irradiation.

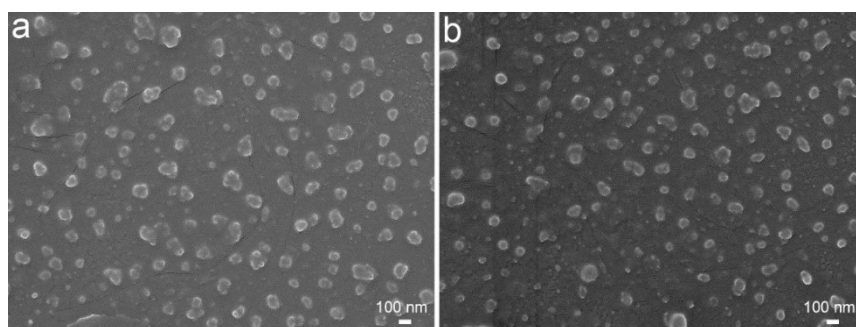

**Figure S4.** The SEM images of IEICO NPs after (a) 5 min and (b) 10 min laser

irradiation.

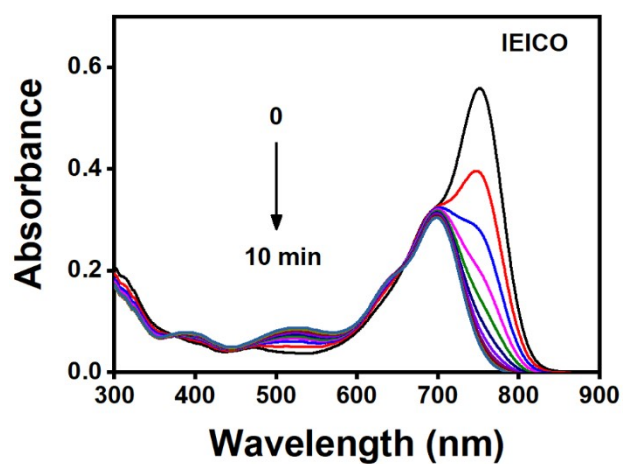

**Figure S5.** Time-dependent absorption spectra of IEICO dissolve in toluene under laser irradiation ( $0.5 \text{ W/cm}^2$ , 10 min).

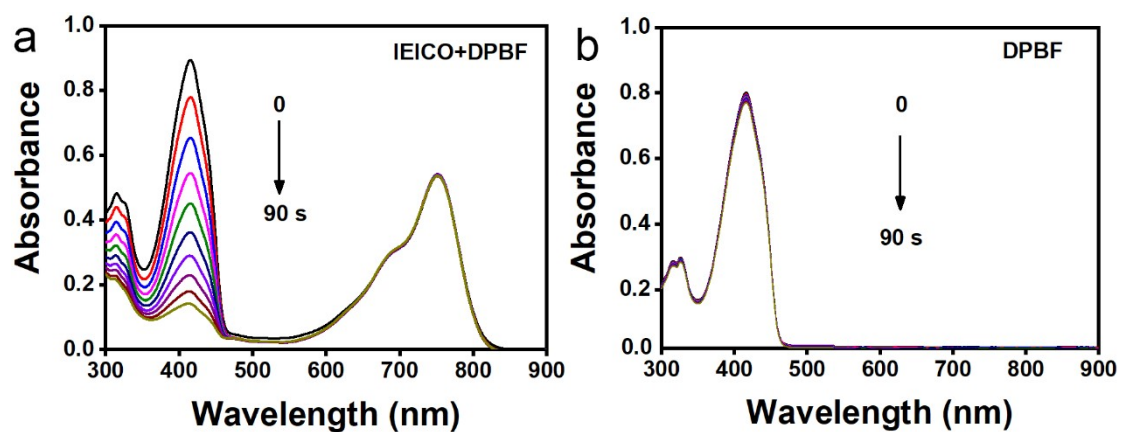

**Figure S6.** The absorbance spectrum of (a) IEICO+DPBF (in Toluene) and (b) DPBF (in Toluene) under the laser irradiation ( $0.05 \text{ W/cm}^2$ ).

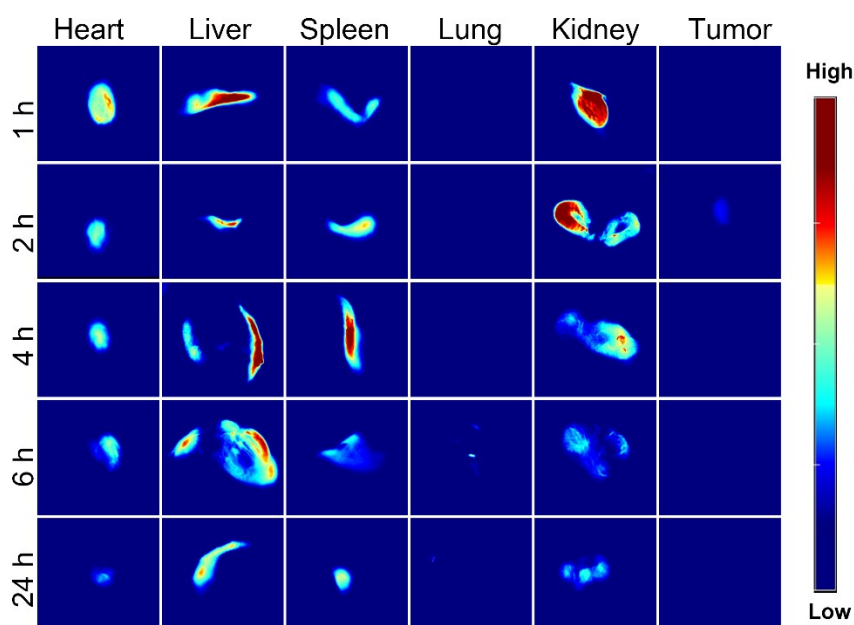

**Figure S7.** Photoacoustic imaging of organs and tumor after intravenous injection at different times.

## References

1. B. Shi, Q. Yan, J. Tang, K. Xin, J. Zhang, Y. Zhu, G. Xu, R. Wang, J. Chen, W. Gao, T. Zhu, J. Shi, C. Fan, C. Zhao and H. Tian, *Nano Lett.*, 2018, **18**, 6411-6416.
2. Y. Xu, Y. Zhang, J. Li, J. An, C. Li, S. Bai, A. Sharma, G. Deng, J. S. Kim and Y. Sun, *Biomaterials*, 2020, **259**, 120315.
3. J. Chen, K. Wen, H. Chen, S. Jiang, X. Wu, L. Lv, A. Peng, S. Zhang and H. Huang, *Small*, 2020, **16**, 2000909.
4. C. Zhang, J. Wu, W. Liu, X. Zheng, W. Zhang, C.-S. Lee and P. Wang, *ACS Appl. Bio. Mater.*, 2020, **3**, 3817-3826.
5. P. Sun, Q. Wu, X. Sun, H. Miao, W. Deng, W. Zhang, Q. Fan and W. Huang, *Chem. Comm.*, 2018, **54**, 13395-13398.
6. Y. Cai, C. Tang, Z. Wei, C. Song, H. Zou, G. Zhang, J. Ran and W. Han, *ACS Appl. Bio Mater.*, 2021, **4**, 1942-1949.
7. N. Alifu, A. Zebibula, J. Qi, H. Zhang, C. Sun, X. Yu, D. Xue, J. W. Y. Lam, G. Li, J. Qian and B. Z. Tang, *ACS Nano*, 2018, **12**, 11282-11293.
8. T. Li, L. Liu, P. Xu, P. Yuan, Y. Tian, Q. Cheng and L. Yan, *Adv. Therap.*, 2021,

- 4, 2000240.
9. T. Li, C. Li, Z. Ruan, P. Xu, X. Yang, P. Yuan, Q. Wang and L. Yan, *ACS Nano*, 2019, **13**, 3691-3702.
  10. F. Li, T. Li, D. Zhi, P. Xu, W. Wang, Y. Hu, Y. Zhang, S. Wang, J. M. Thomas, J. B. Norman, W. Ding, L. Yan and B. Qiu, *Biomaterials*, 2020, **256**, 120219.
  11. K. Wu, H. Zhao, Z. Sun, B. Wang, X. Tang, Y. Dai, M. Li, Q. Shen, H. Zhang, Q. Fan and W. Huang, *Theranostics*, 2019, **9**, 7697-7713.
  12. X. Li, F. Fang, B. Sun, C. Yin, J. Tan, Y. Wan, J. Zhang, P. Sun, Q. Fan, P. Wang, S. Li and C.-S. Lee, *Nanoscale Horiz.*, 2021, **6**, 177-185.
  13. Y. F. Xiao, C. Y. Xiang, S. L. Li, C. Mao, H. T. Chen, J. X. Chen, S. Tian, X. Cui, Y. P. Wan, Z. M. Huang, X. Z. Li, X. H. Zhang, W. S. Guo and C. S. Lee, *Small*, 2020, **16**.
  14. X. Li, L. Liu, S. Li, Y. Wan, J. X. Chen, S. Tian, Z. Huang, Y. F. Xiao, X. Cui, C. Xiang, Q. Tan, X. H. Zhang, W. Guo, X. J. Liang and C. S. Lee, *ACS Nano*, 2019, **13**, 12901-12911.
